# Supplementary material for: Computational-Based Polyphenol Therapy for Nonsmall Cell Lung Cancer: Naringin Coamorphous Systems for Solubility and Bioavailability Enhancement
Source: PubMed Central journal article supplement (PMC11304383; doi:10.1021/acs.molpharmaceut.4c00303), 2024-07-25
Supplement: mp4c00303_si_001.pdf [file mp4c00303_si_001.pdf]

A computational-based Polyphenol therapy for Non-Small Cell Lung Cancer:  
Naringin co-amorphous systems for solubility and bioavailability enhancement.

*Dani Lakshman Yarlagadda <sup>a</sup>, Subham Das <sup>b</sup>, Vullendula Sai Krishna Anand <sup>a</sup>, Suman Manandhar <sup>c</sup>, Swapnil J Dengale <sup>d</sup>, K Sreedhara Ranganath Pai <sup>c</sup>, Krishnamurthy Bhat <sup>a\*</sup>*

- a. Department of Pharmaceutical Quality Assurance, Manipal College of Pharmaceutical Sciences, Manipal Academy of Higher Education (MAHE), Manipal, Karnataka – 576104, India.
- b. Department of Pharmaceutical Chemistry, Manipal College of Pharmaceutical Sciences, Manipal Academy of Higher Education (MAHE), Manipal, Karnataka – 576104, India.
- c. Department of Pharmacology, Manipal College of Pharmaceutical Sciences, Manipal Academy of Higher Education (MAHE), Manipal 576104, India.
- d. Department of Pharmaceutical Analysis, National Institute of Pharmaceutical Education and Research (NIPER), Guwahati, Changsari 781101, India



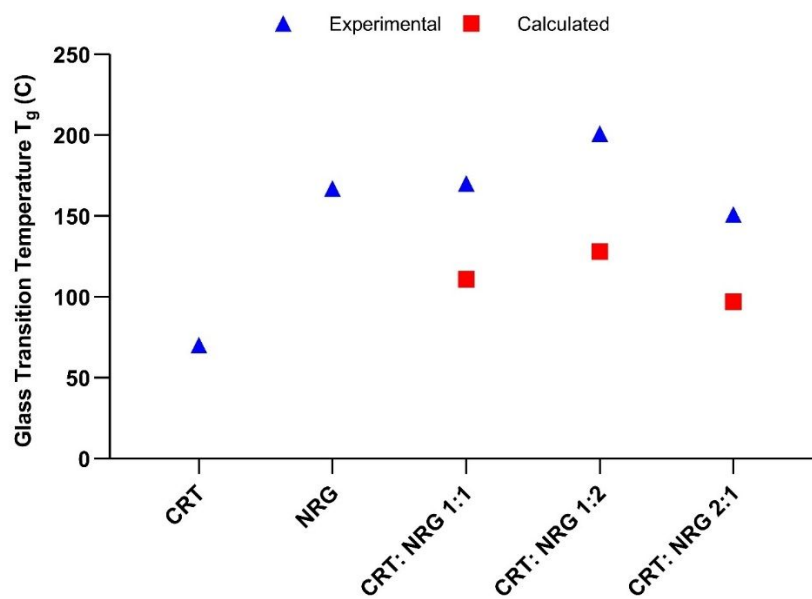

Figure S3. Experimental and Theoretical glass transition temperature (T<sub>g</sub>) of Ceritinib (CRT), Naringin (NRG), and co-amorphous systems using Gordon Taylor equation.

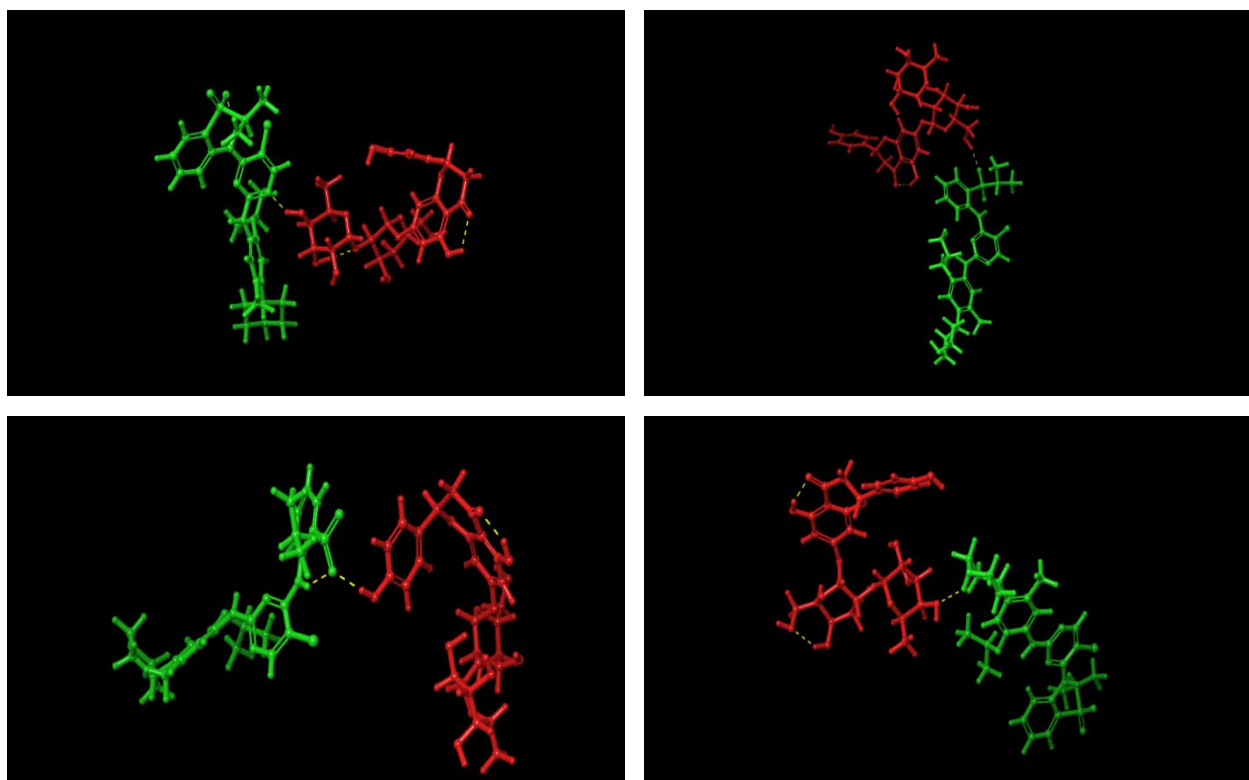

Figure S4. pi-pi interactions between CRT-RTH systems from MD simulation. (Red-CRT, Green- RTH, Blue- pi-pi interactions, Yellow- Hydrogen bonds)

**Table S1.** NRG and CRT, along with their chemical structure and docking score.

| Compound name | Chemical structure                                                                 | Docking score (Kcal/mol) |
|---------------|------------------------------------------------------------------------------------|--------------------------|
| Naringin      | 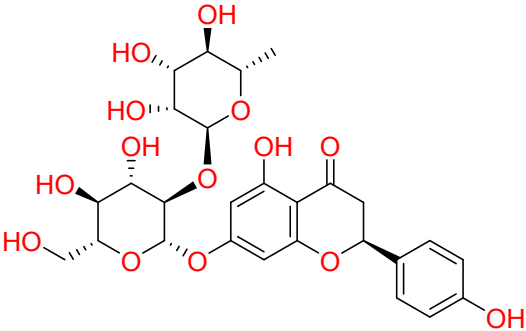 | -10.970                  |
| Ceritinib     |  | -9.035                   |

**Table S2.** 2D interaction diagram alongwith binding interaction of NRG and CRT at the binding site of the CYP3A4 protein

| Compound name | Chemical structure                                                                   | Binding interactions                        |
|---------------|--------------------------------------------------------------------------------------|---------------------------------------------|
| Naringin      | 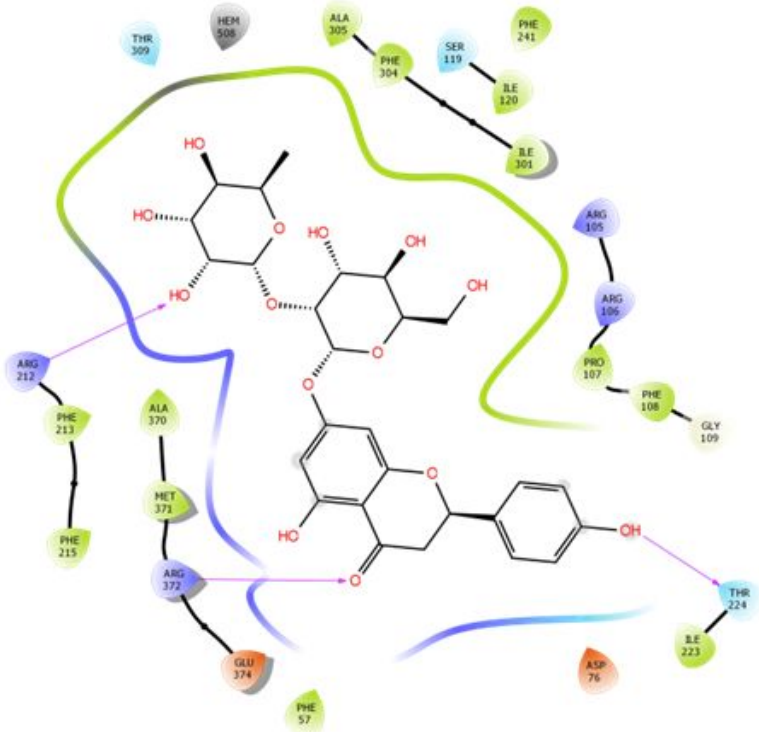 | ARG212, THR224, ARG372 (H-bond interaction) |

Ceritinib

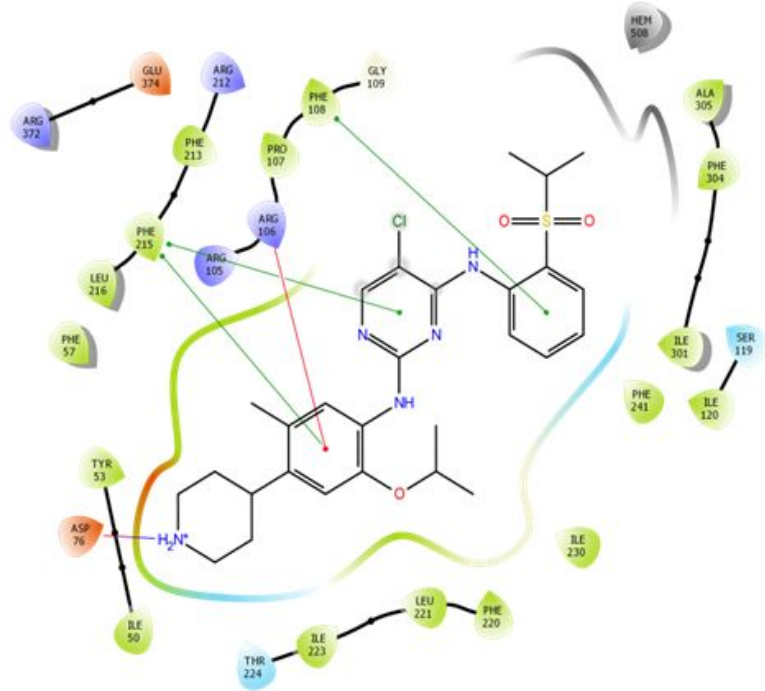

ASP76 (salt  
bridge),  
ARG106  
(pi-cation),  
PHE108,  
PHE215  
(pi-pi  
stacking)
